# Supplementary material for: Effective population sizes and adaptive genetic variation in a captive bird population
Source: PeerJ. 2018 Oct 18;6:e5803. doi: 10.7717/peerj.5803 (PMC6196071; doi:10.7717/peerj.5803)
Supplement: Supplemental Information 1 — Data file which includes all the microsatellite genotyping data, as well as the SNP data for the study population. The SNP data is formatted in the GenAlex format, whereas the microsatellite data is presented in the Genepop format. [file peerj-06-5803-s002.xlsx]

## Sheet: MHC SNP genotypes
Codominant data template			Pop1		Region1
Sample	Pop	Locus1		Locus2		Locus3		Locus4		Locus5		Locus6		Locus7		Locus8		Locus9		Locus10		Locus11		Locus12		Locus13		Locus14		Locus15		Locus16		Locus17		Locus18		Locus19		Locus20		Locus21		Locus22		Locus23		Locus24
1	Pop1	G	G	C	C	T	T	G	G	C	C	G	G	G	G	G	G	T	T	C	C	A	A	T	T	0	0	G	G	G	G	G	G	A	A	G	G	A	A	C	C	0	0	C	C	C	C	C	C
2	Pop1	G	G	C	C	T	T	G	G	C	C	G	G	G	G	G	G	T	T	C	C	A	A	T	T	C	C	G	G	G	G	G	G	A	A	G	G	A	A	C	C	G	G	C	C	C	C	C	C
3	Pop1	G	G	C	C	T	T	G	G	C	C	G	G	G	G	G	G	T	T	C	C	A	A	T	T	C	C	G	G	G	G	G	G	A	A	G	G	A	A	C	C	G	G	C	C	C	C	C	C
4	Pop1	G	G	C	C	T	T	G	G	C	C	G	G	G	G	G	G	T	T	C	C	A	A	T	T	C	C	G	G	G	G	G	G	A	A	G	G	A	A	C	C	G	G	C	C	C	C	C	C
5	Pop1	G	G	C	C	T	T	G	G	C	C	G	G	G	G	G	G	T	T	C	C	A	A	T	T	C	C	G	G	G	G	G	G	A	A	G	G	A	A	C	C	G	G	C	C	C	C	C	C
6	Pop1	G	G	C	C	T	T	G	G	C	C	G	G	G	G	G	G	T	T	C	C	A	A	T	T	C	C	G	G	G	G	G	G	A	A	G	G	A	A	C	C	G	G	C	C	C	C	C	C
7	Pop1	G	G	C	C	T	T	G	G	C	C	G	G	G	G	G	G	T	T	C	C	A	A	T	T	C	C	G	G	G	G	G	G	A	A	G	G	A	A	C	C	G	G	C	C	C	C	C	C
8	Pop1	G	G	C	C	T	T	G	G	C	C	G	G	G	G	G	G	T	T	C	C	A	A	T	T	C	C	G	G	G	G	G	G	A	A	G	G	A	A	C	C	G	G	C	C	C	C	C	C
9	Pop1	G	G	C	C	T	T	G	G	C	C	G	G	G	G	G	G	T	T	C	C	A	A	T	T	C	C	G	G	G	G	G	G	A	A	G	G	A	A	C	C	G	G	C	C	C	C	C	C
10	Pop1	G	G	C	C	T	T	G	G	C	C	G	G	G	G	G	G	T	T	C	C	A	A	T	T	C	C	G	G	G	G	G	G	A	A	G	G	A	A	C	C	G	G	C	C	C	C	C	C
11	Pop1	G	G	C	C	T	T	G	G	C	C	G	G	G	G	G	G	T	T	C	C	A	A	T	T	C	C	G	G	G	G	G	G	A	A	G	G	A	A	C	C	G	G	C	C	C	C	C	C
12	Pop1	G	G	C	C	T	T	G	G	C	C	G	G	G	G	G	G	T	T	C	C	A	A	T	T	C	C	G	G	G	G	G	G	A	A	G	G	A	A	C	C	G	G	C	C	C	C	C	C
13	Pop1	G	G	C	C	T	T	G	G	C	C	G	G	G	G	G	G	T	T	C	C	A	A	T	T	C	C	G	G	G	G	G	G	A	A	G	G	A	A	C	C	G	G	C	C	C	C	C	C
14	Pop1	G	G	C	C	T	T	G	G	C	C	G	G	G	G	G	G	T	T	C	C	A	A	T	T	C	C	G	G	G	G	G	G	A	A	G	G	A	A	C	C	G	G	C	C	C	C	C	C
15	Pop1	G	G	C	C	T	T	G	G	C	C	G	G	G	G	G	G	T	T	C	C	A	A	T	T	C	C	G	G	G	G	G	G	A	A	G	G	A	A	C	C	G	G	C	C	C	C	C	C
16	Pop1	G	G	C	C	T	T	G	G	C	C	G	G	G	G	G	G	T	T	C	C	A	A	T	T	C	C	G	G	G	G	G	G	A	A	G	G	A	A	C	C	G	G	C	C	C	C	C	C
17	Pop1	G	G	C	C	T	T	G	G	C	C	G	G	G	G	G	G	T	T	C	C	A	A	T	T	C	C	G	G	G	G	G	G	A	A	G	G	A	A	C	C	G	G	C	C	C	C	C	C
18	Pop1	G	G	C	C	T	T	G	G	C	C	G	G	G	G	G	G	T	T	C	C	A	A	T	T	C	C	G	G	G	G	G	G	A	A	G	G	A	A	C	C	G	G	C	C	C	C	C	C
19	Pop1	G	G	C	C	T	T	G	G	C	C	G	G	G	G	G	G	T	T	C	C	A	A	T	T	C	C	G	G	G	G	G	G	A	A	G	G	A	A	C	C	G	G	C	C	C	C	C	C
20	Pop1	G	G	C	C	T	T	G	G	C	C	G	G	G	G	G	G	C	T	C	C	A	G	T	T	C	C	G	G	A	G	A	G	A	G	G	G	A	A	C	T	G	G	C	C	C	C	C	T
21	Pop1	G	G	C	C	T	T	G	G	C	C	G	G	G	G	G	G	C	T	C	C	A	G	T	T	C	C	G	G	A	G	A	G	A	G	G	G	A	A	C	T	G	G	C	C	C	C	C	T
22	Pop1	G	G	C	C	T	T	G	G	C	C	G	G	G	G	G	G	C	T	C	C	A	G	T	T	C	C	G	G	A	G	A	G	A	G	G	G	A	A	C	T	G	G	C	C	C	C	C	T
23	Pop1	G	G	C	C	T	T	G	G	C	C	G	G	G	G	G	G	C	T	C	C	A	G	T	T	C	C	G	G	A	G	A	G	A	G	G	G	A	A	C	T	G	G	C	C	C	C	C	T
24	Pop1	G	G	C	C	T	T	G	G	C	C	G	G	G	G	G	G	C	T	C	C	A	G	T	T	C	C	G	G	A	G	A	G	A	G	G	G	A	A	C	T	G	G	C	C	C	C	C	T
25	Pop1	G	G	C	C	T	T	G	G	C	C	G	G	G	G	G	G	C	T	C	C	A	G	T	T	C	C	G	G	A	G	A	G	A	G	G	G	A	A	C	T	G	G	C	C	C	C	C	T
26	Pop1	G	G	C	C	T	T	G	G	C	C	G	G	G	G	G	G	C	T	C	C	A	G	T	T	C	C	G	G	A	G	A	G	A	G	G	G	A	A	C	T	G	G	C	C	C	C	C	T
27	Pop1	G	G	C	C	T	T	G	G	C	C	G	G	G	G	G	G	C	T	C	C	A	G	T	T	C	C	G	G	A	G	A	G	A	G	G	G	A	A	C	T	G	G	C	C	C	C	C	T
[truncated: 132 more columns]

## Sheet: Microsatellite Genotypes
Title line:"RJF-1pop"
Locus1
Locus2
Locus3
Locus4
Locus5
Locus6
Locus7
Locus8
Locus9
Locus10
Locus11
Locus12
Locus13
Locus14
Locus15
Pop
Pop1, 0102 0203 0102 0101 0102 0101 0102 0101 0101 0102 0202 0101 0101 0202 0202
Pop1, 0102 0202 0101 0102 0203 0102 0202 0101 0102 0202 0101 0101 0202 0202 0101
Pop1, 0102 0202 0101 0101 0303 0101 0203 0101 0102 0202 0101 0202 0101 0101 0203
Pop1, 0102 0103 0202 0101 0102 0101 0203 0101 0101 0202 0103 0102 0101 0202 0202
Pop1, 0102 0102 0101 0101 0102 0101 0303 0101 0101 0101 0102 0102 0103 0202 0202
Pop1, 0101 0203 0102 0102 0102 0101 0202 0101 0102 0102 0102 0101 0202 0000 0102
Pop1, 0102 0203 0202 0101 0101 0101 0103 0101 0101 0101 0102 0102 0101 0202 0202
Pop1, 0000 0202 0101 0101 0101 0102 0102 0101 0102 0101 0102 0101 0202 0202 0102
Pop1, 0102 0103 0102 0101 0101 0101 0203 0101 0101 0102 0203 0101 0101 0202 0202
Pop1, 0102 0202 0101 0101 0203 0101 0203 0101 0101 0101 0102 0101 0103 0102 0202
Pop1, 0101 0202 0102 0102 0103 0102 0102 0101 0101 0102 0102 0101 0101 0202 0102
Pop1, 0102 0102 0102 0101 0101 0101 0202 0101 0101 0102 0203 0101 0101 0202 0202
Pop1, 0101 0202 0101 0101 0101 0101 0103 0101 0101 0102 0102 0102 0103 0202 0202
Pop1, 0202 0202 0101 0101 0101 0101 0203 0101 0101 0101 0102 0102 0101 0202 0202
Pop1, 0101 0303 0102 0101 0102 0101 0203 0101 0101 0102 0102 0101 0101 0202 0202
Pop1, 0202 0103 0202 0101 0101 0101 0103 0101 0101 0000 0203 0102 0000 0000 0202
Pop1, 0202 0202 0102 0101 0202 0102 0102 0101 0101 0101 0000 0101 0202 0202 0102
Pop1, 0202 0102 0202 0101 0202 0101 0103 0101 0101 0202 0102 0101 0101 0202 0202
Pop1, 0101 0203 0101 0101 0203 0101 0102 0101 0102 0202 0102 0101 0101 0202 0102
Pop1, 0101 0203 0102 0102 0202 0102 0202 0101 0101 0102 0102 0101 0202 0202 0102
Pop1, 0101 0102 0102 0101 0101 0101 0000 0000 0101 0101 0000 0101 0101 0202 0202
Pop1, 0102 0202 0102 0101 0102 0101 0102 0101 0101 0202 0202 0101 0101 0202 0202
Pop1, 0102 0203 0101 0102 0102 0101 0203 0101 0102 0102 0103 0101 0101 0202 0202
Pop1, 0102 0202 0202 0102 0101 0102 0103 0101 0101 0202 0202 0101 0101 0202 0202
Pop1, 0102 0102 0102 0101 0102 0101 0203 0101 0101 0102 0202 0101 0101 0202 0202
